# Supplementary material
Source: HighWire-hosted journal article supplement (https://jitc.bmj.com/content/10/3/e003477)

## Supplementary Figure S3

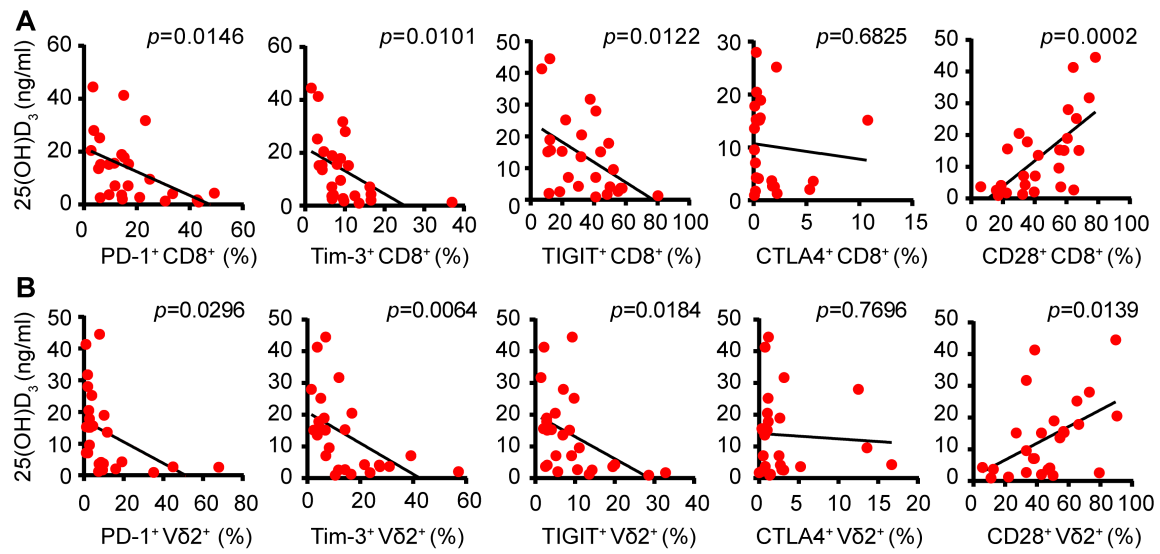

Supplement: inline-supplementary-material-5 [file inline-supplementary-material-5.pdf]
