# Supplementary material
Source: HighWire-hosted journal article supplement (https://jitc.bmj.com/content/10/3/e003477)

## Supplementary Figure S14

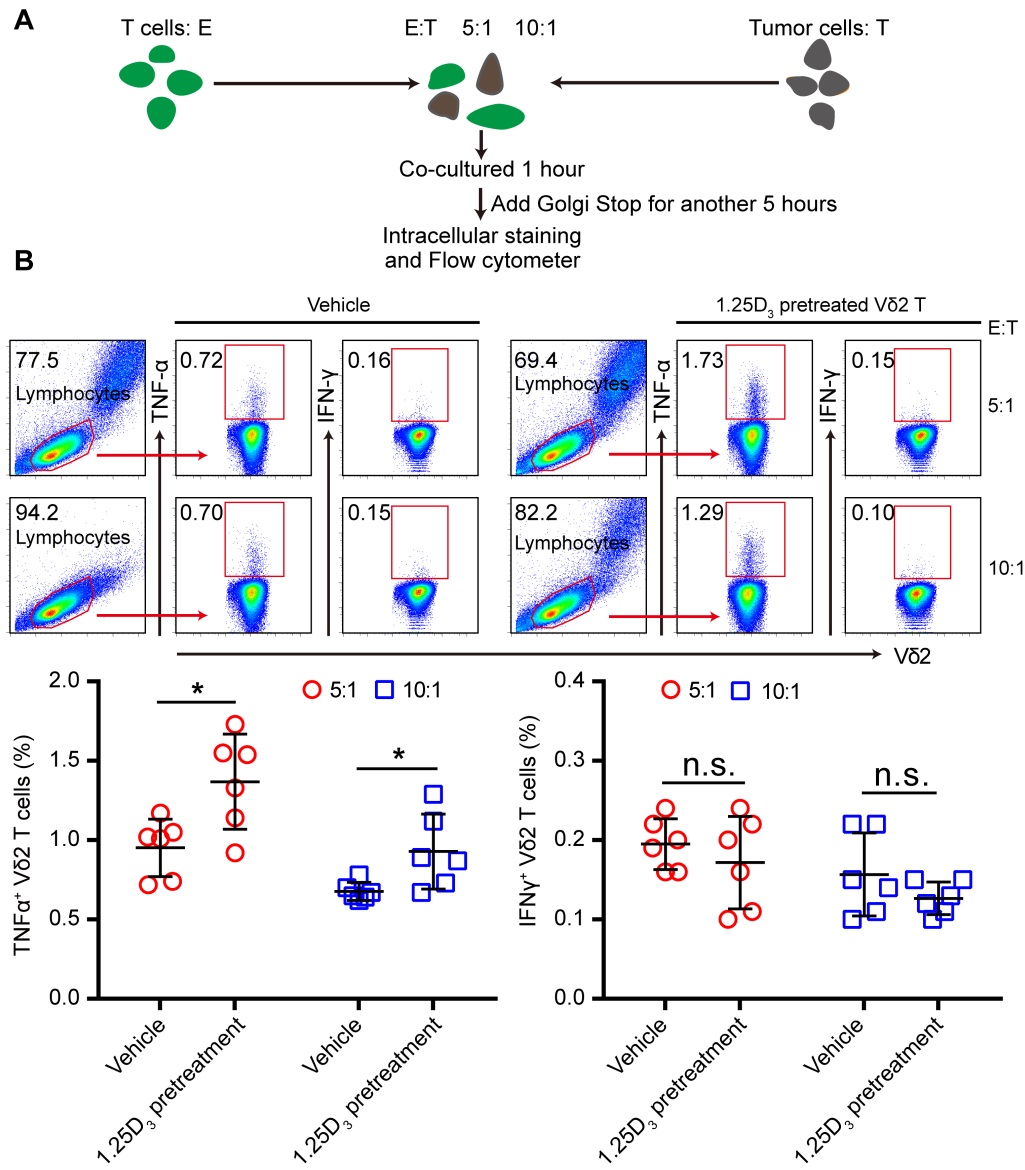

Supplement: inline-supplementary-material-16 [file inline-supplementary-material-16.pdf]
