# Supplementary material
Source: HighWire-hosted journal article supplement (https://jitc.bmj.com/content/10/3/e003477)

**Supplementary Figure S15**

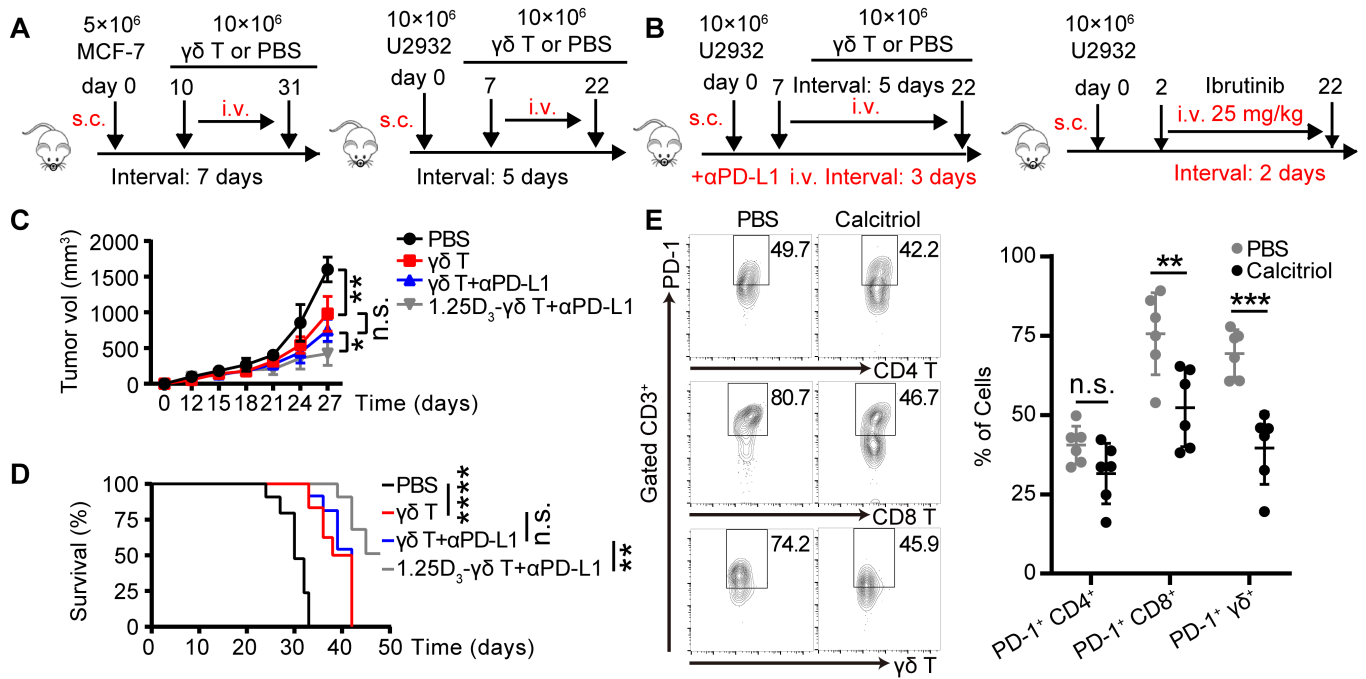

Supplement: inline-supplementary-material-17 [file inline-supplementary-material-17.pdf]
